# Supplementary material for: Mechanisms of disease-modifying effect of saracatinib (AZD0530), a Src/Fyn tyrosine kinase inhibitor, in the rat kainate model of temporal lobe epilepsy
Source: PubMed Central journal article supplement — Neurobiol Dis. Author manuscript; Available in PMC 2021 Aug 1. (PMC8325782; doi:10.1016/j.nbd.2021.105410), 2021-06-01

**Fyn**

**Fyn 8d cytosolic**

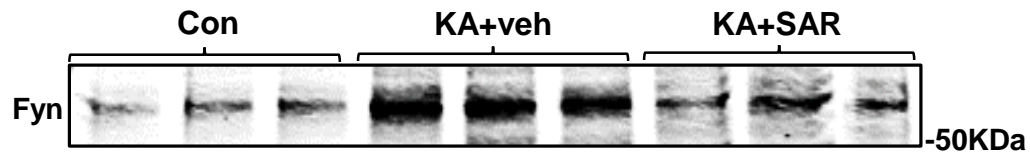

**Fyn 8d nuclear**

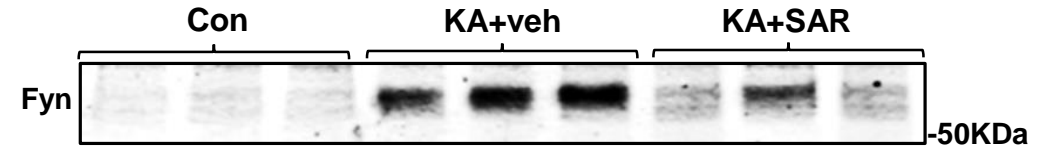

**Full blot**

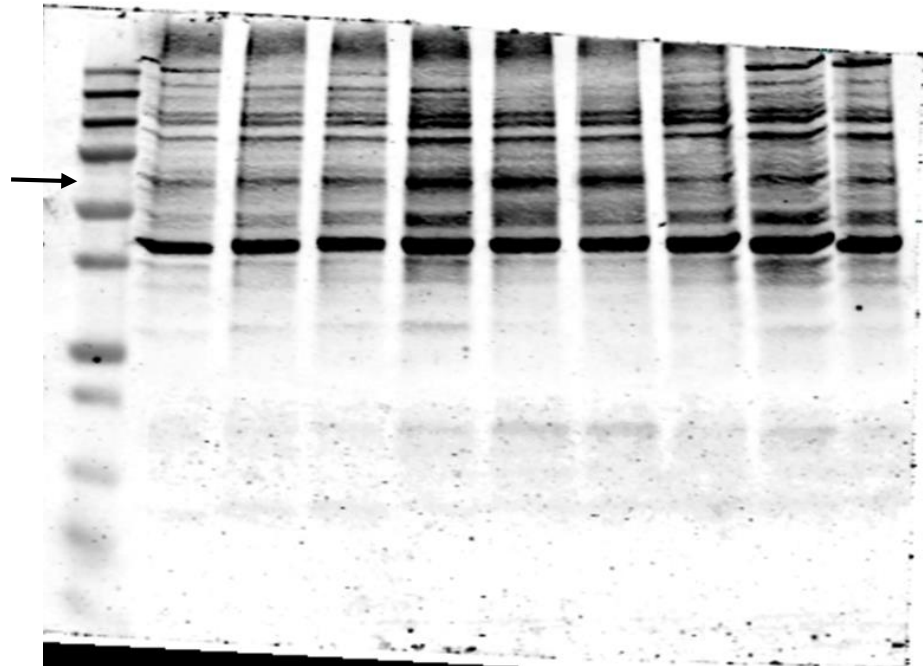

**Full blot**

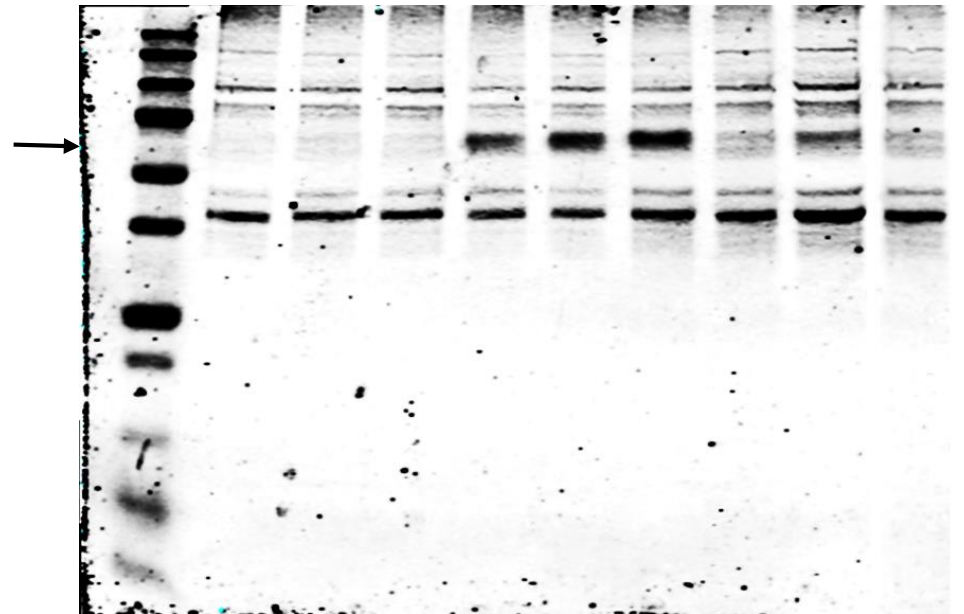

**Fyn**

**Fyn 4m cytosolic**

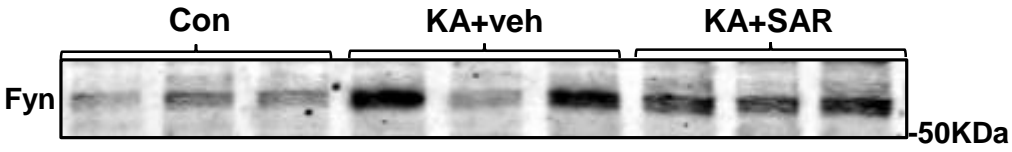

**Fyn 4m nuclear**

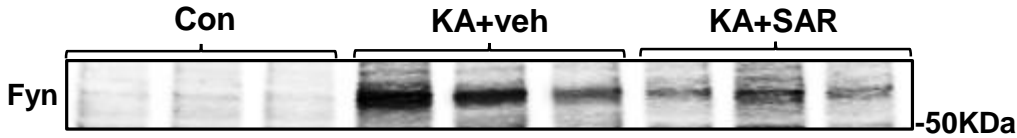

**Full blot**

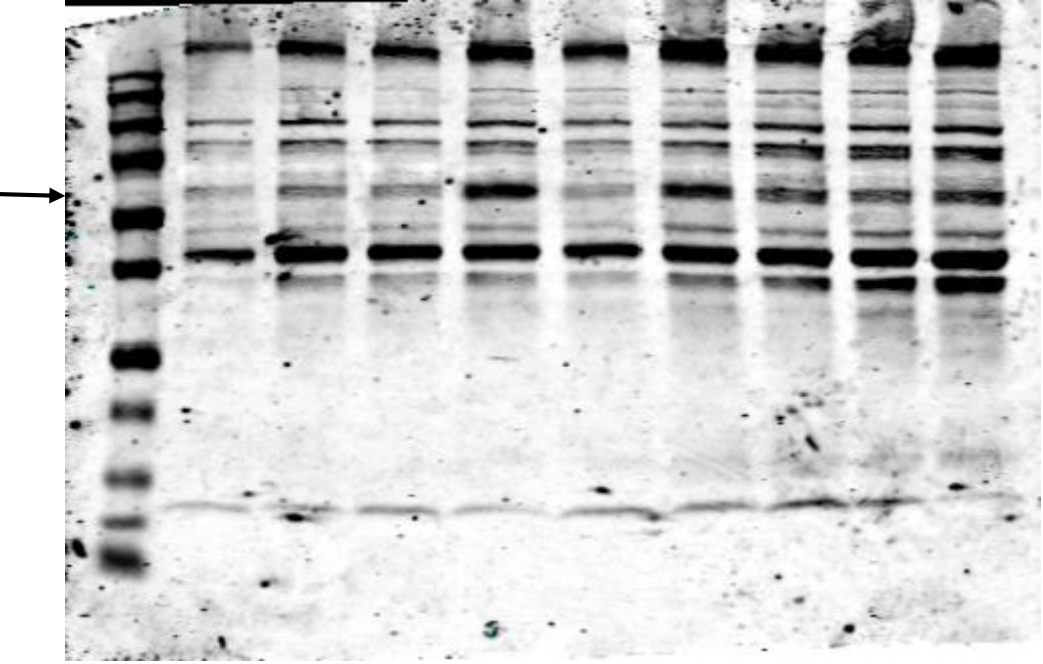

**Full blot**

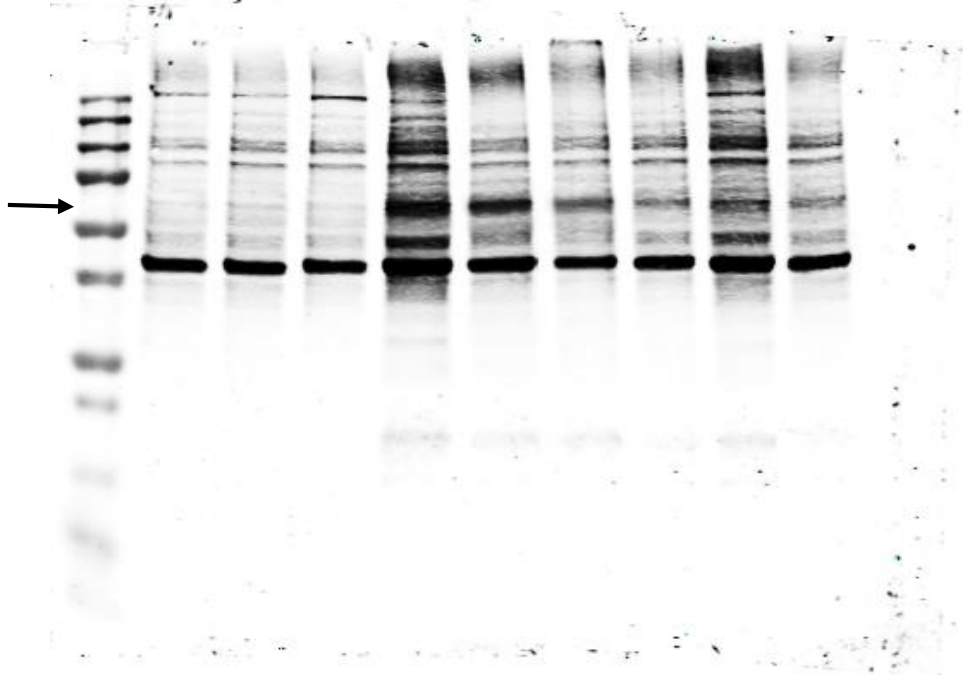

**PKC $\delta$**

**PKC $\delta$  8d cytosolic**

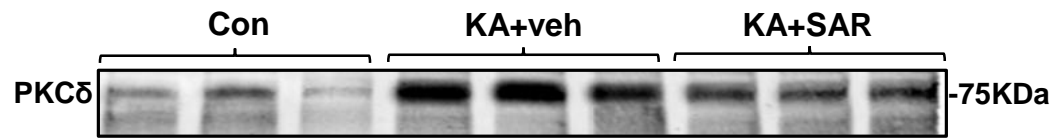

**PKC $\delta$  8d nuclear**

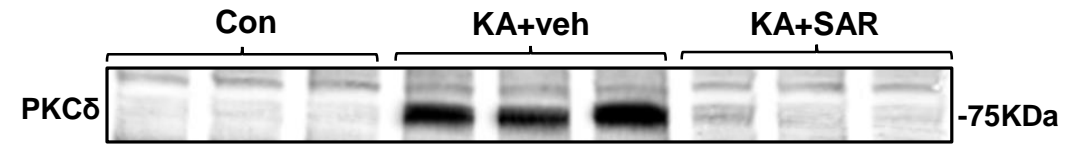

**Full blot**

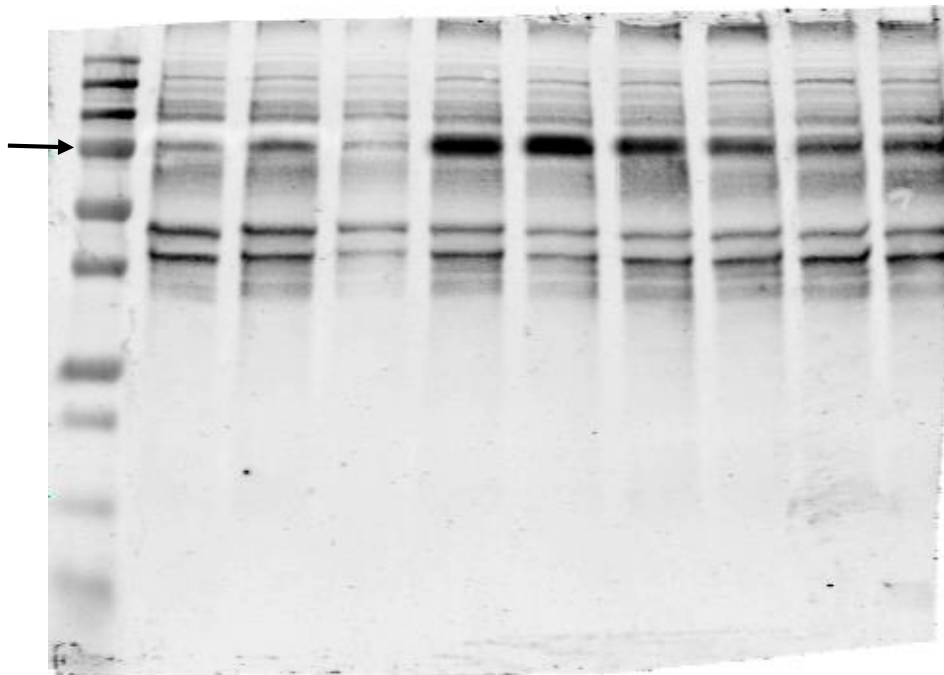

**Full blot**

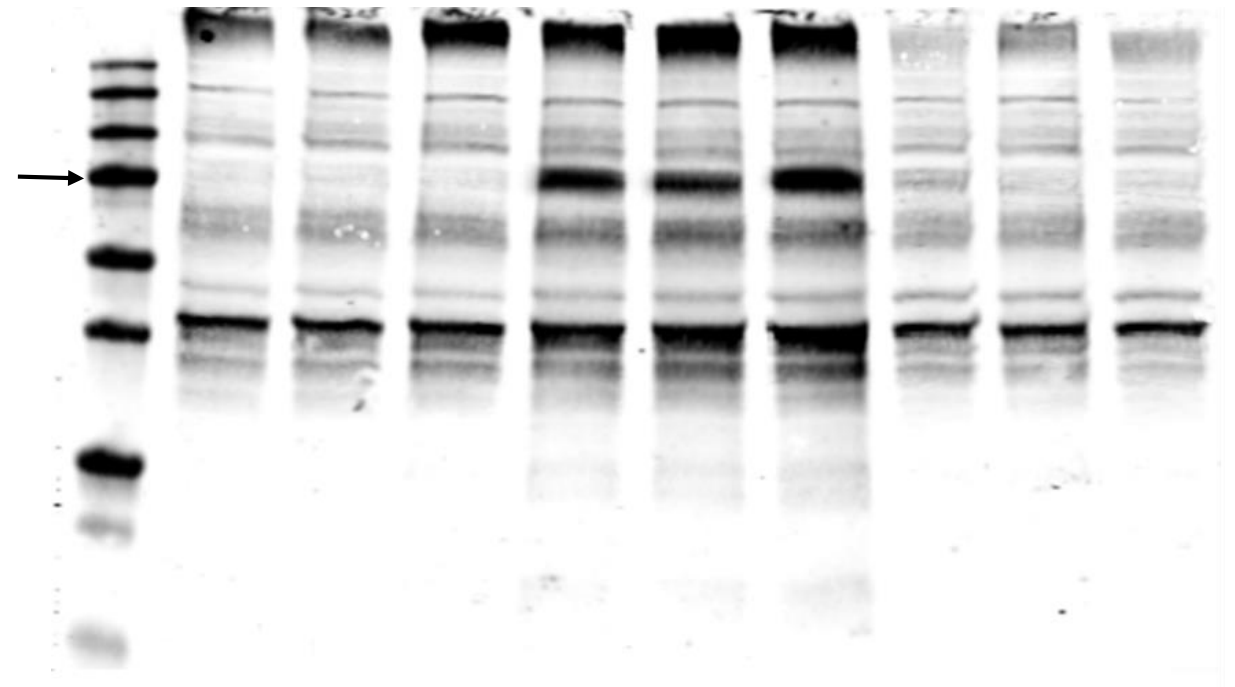

Tyr311 or  
phosphoPKC $\delta$ : whole  
cell lysate (8 day)

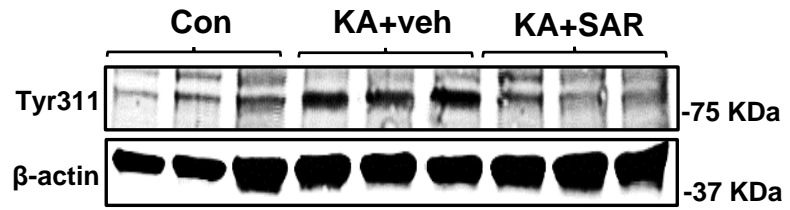

Tyr311 or phosphoPKC $\delta$ :  
whole cell lysate (4 month)

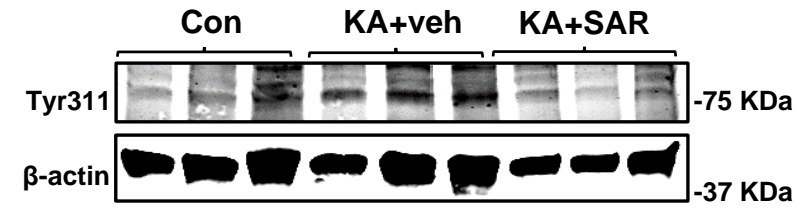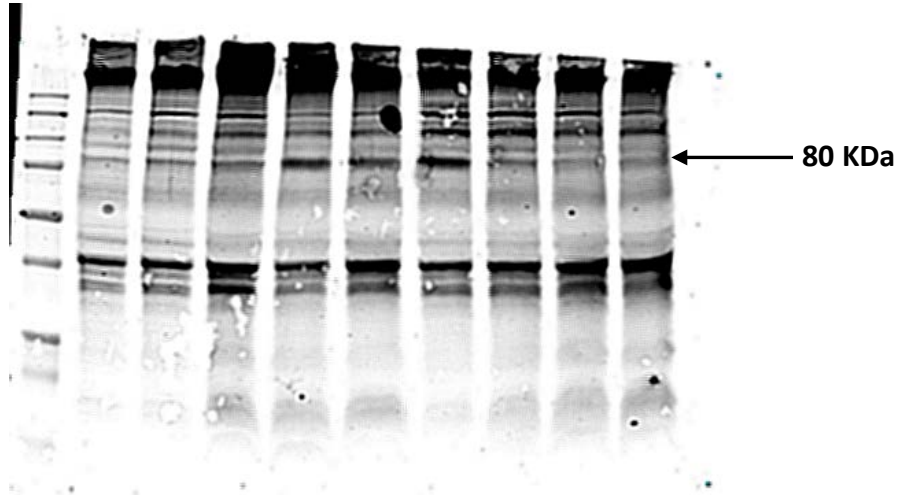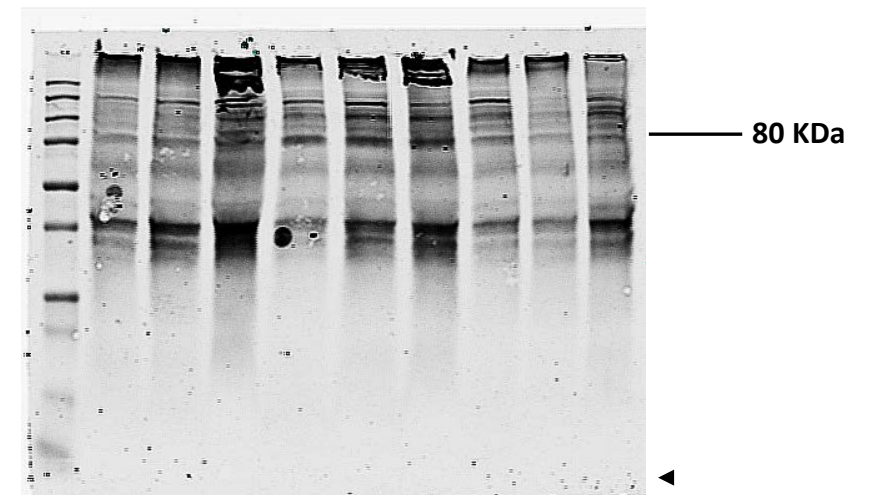

**PKC $\delta$**

**PKC $\delta$  4m cytosolic**

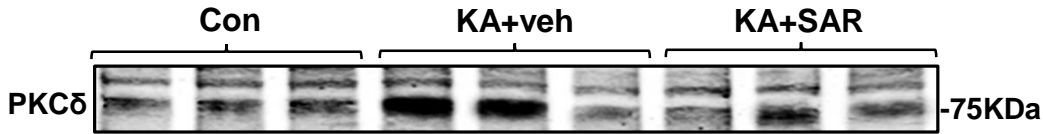

**PKC $\delta$  4m nuclear**

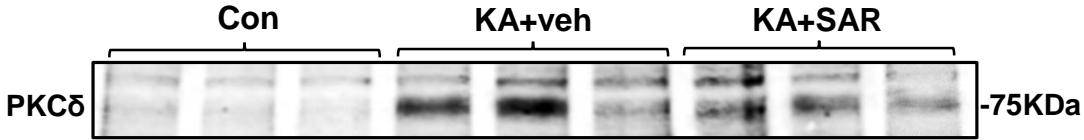

**Full blot**

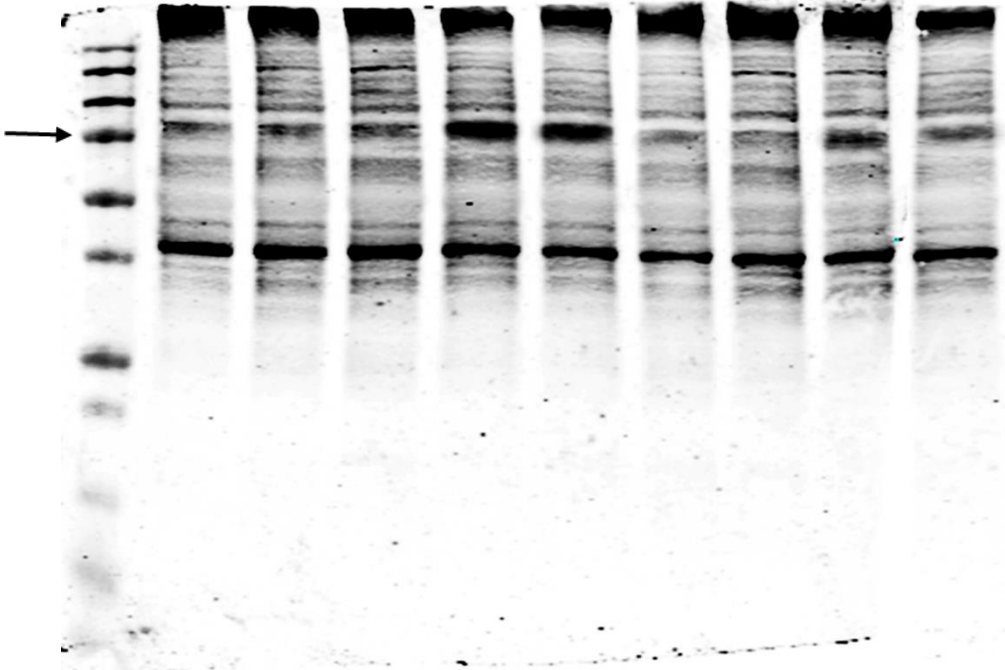

**Full blot**

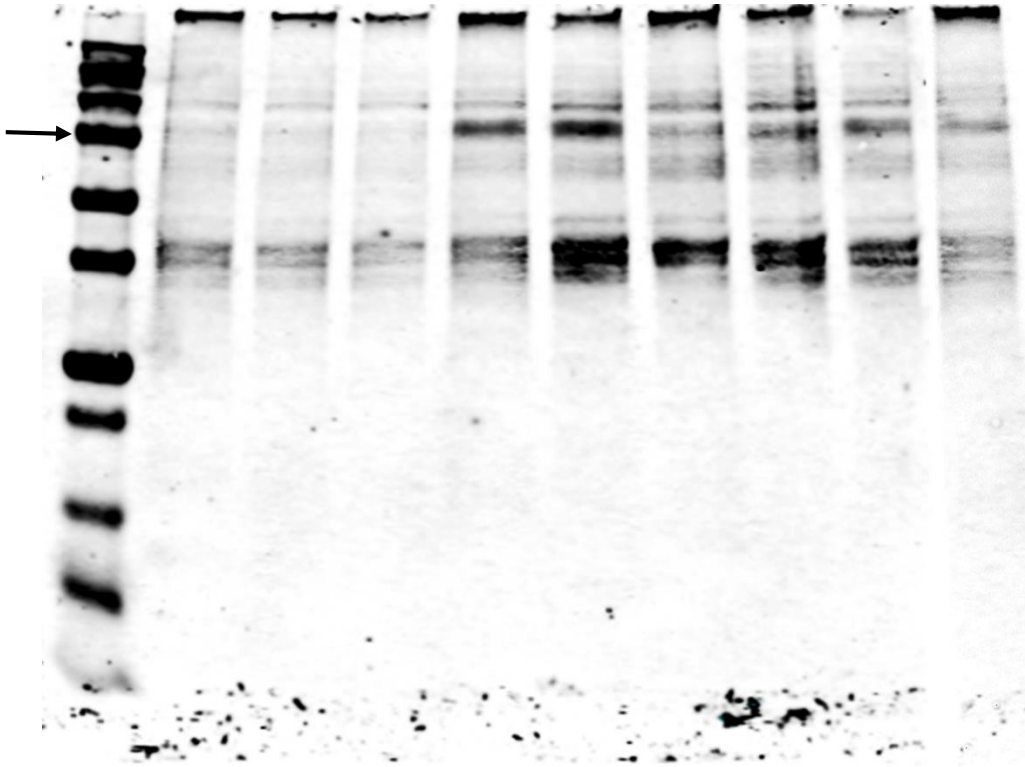

**pSrc-416**

**pSrc-416: 8d**

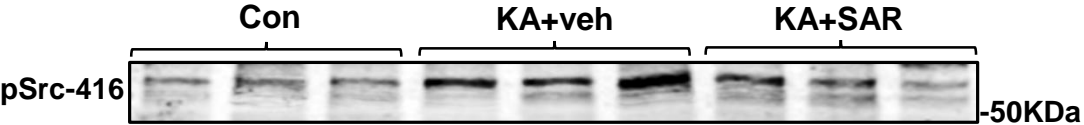

**pSrc-416: 4m**

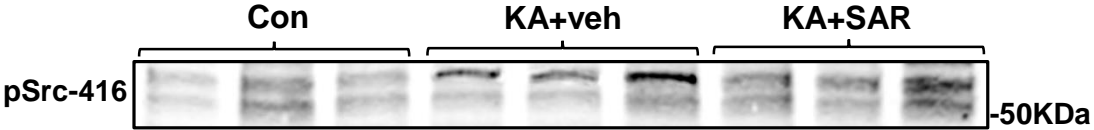

**Full blot**

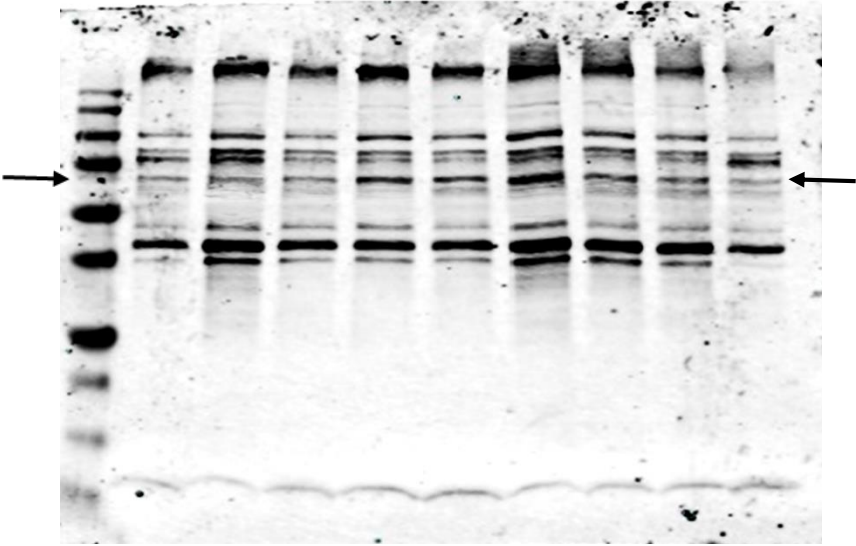

**Full blot**

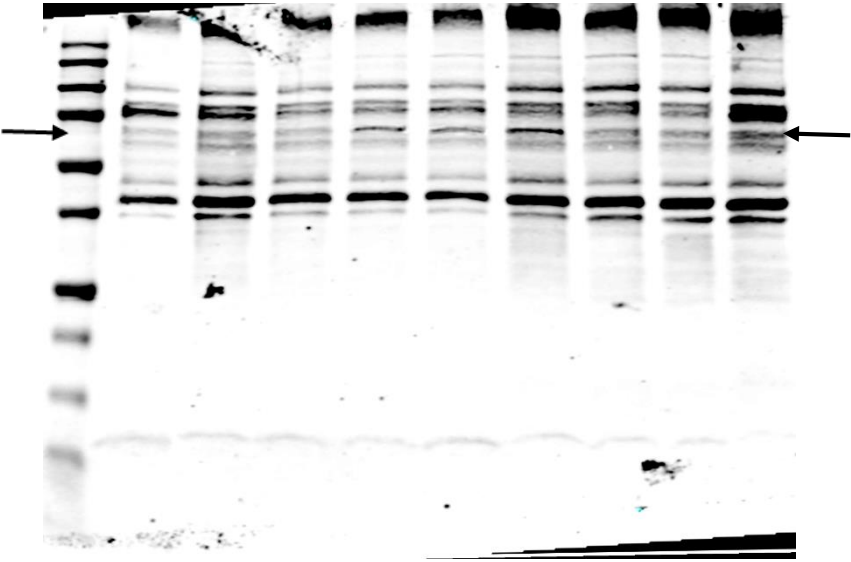

**iNOS**

**iNOS- 8d**

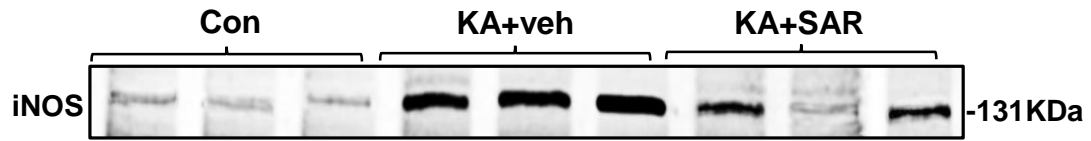

**iNOS- 4m**

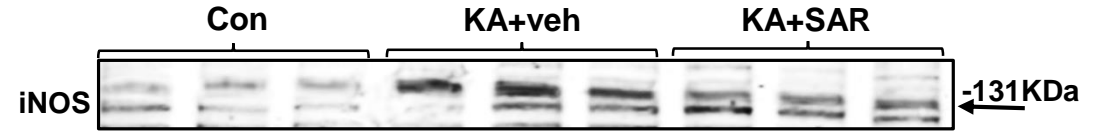

**Full blot**

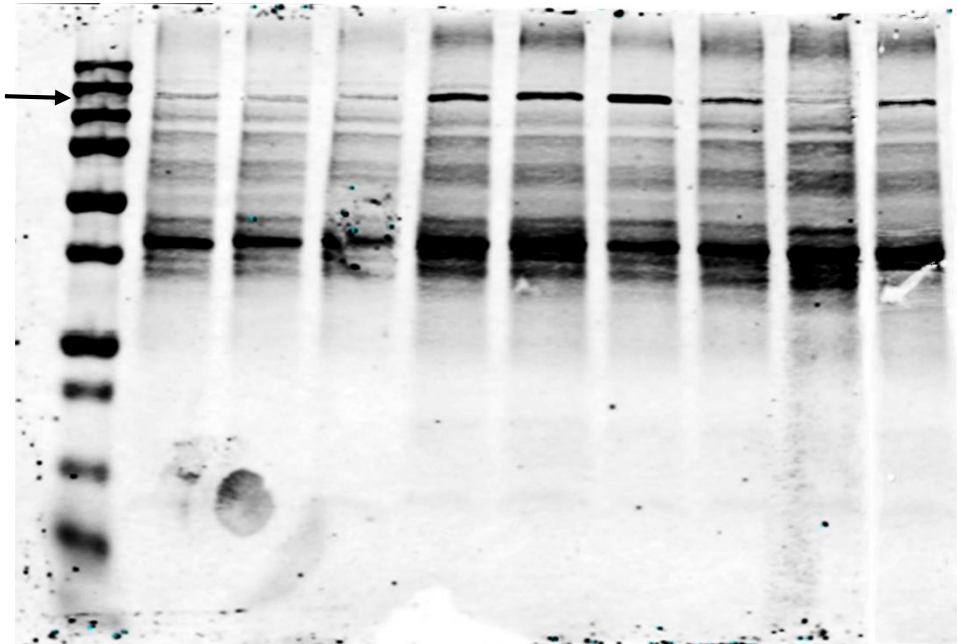

**Full blot**

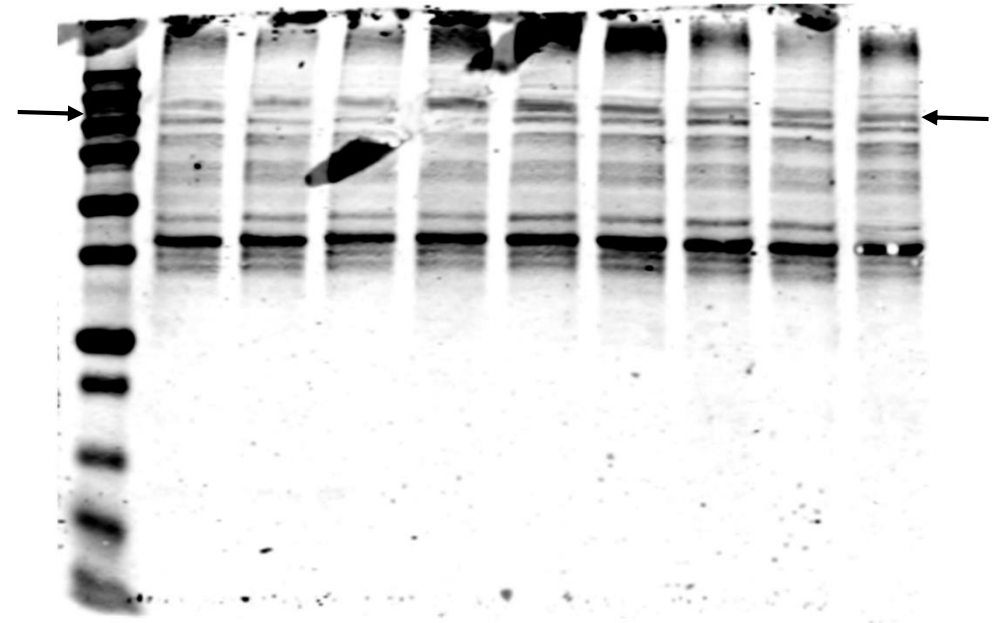

**3-NT**

**3-NT- 8d**

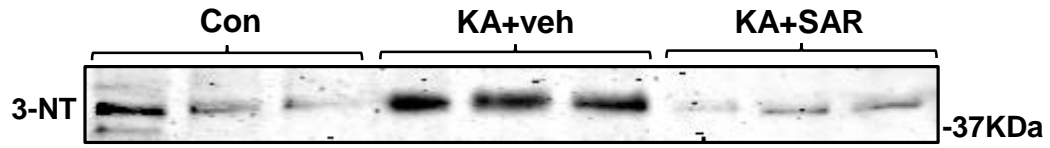

**3-NT- 4m**

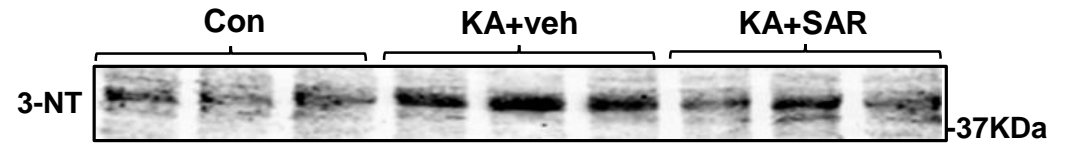

**Full blot**

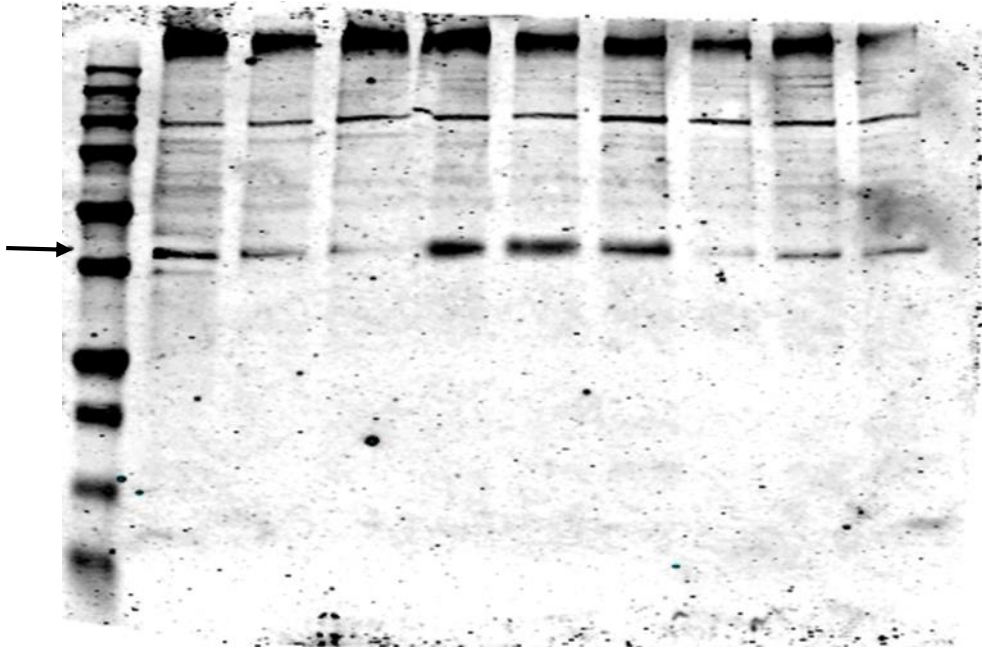

**Full blot**

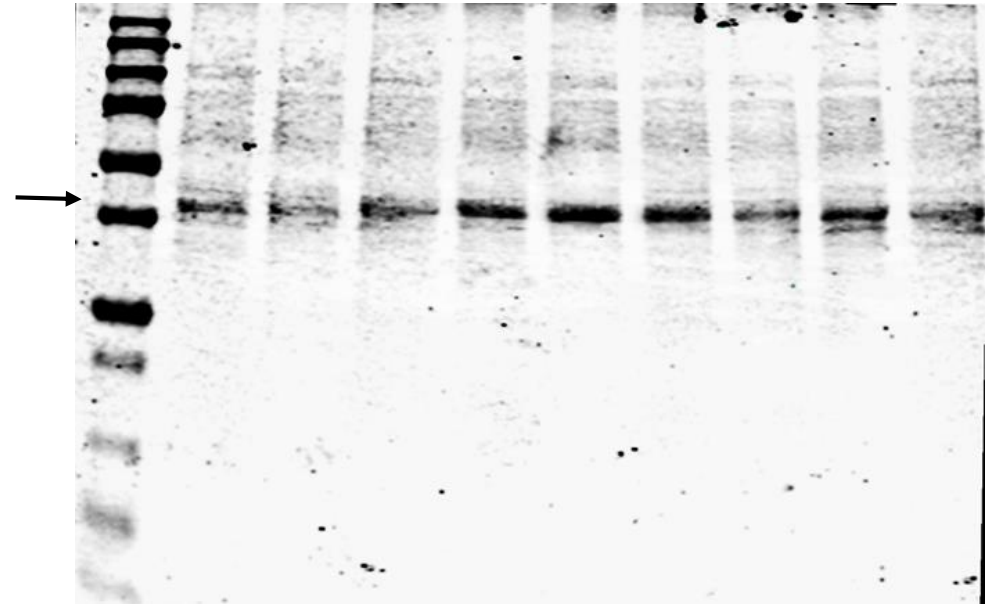



# 4-HNE

## 4-HNE- 8d

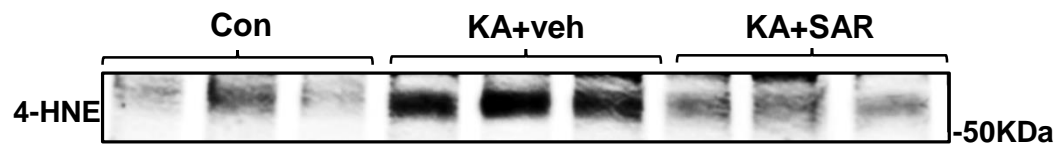

## 4-HNE- 4m

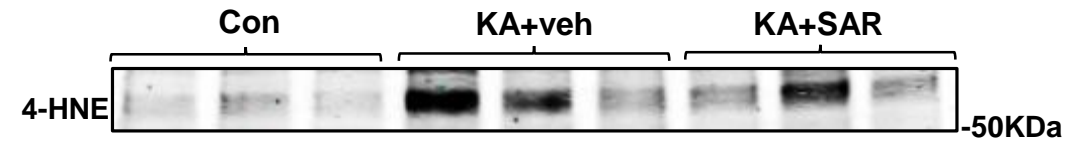

## Full blot

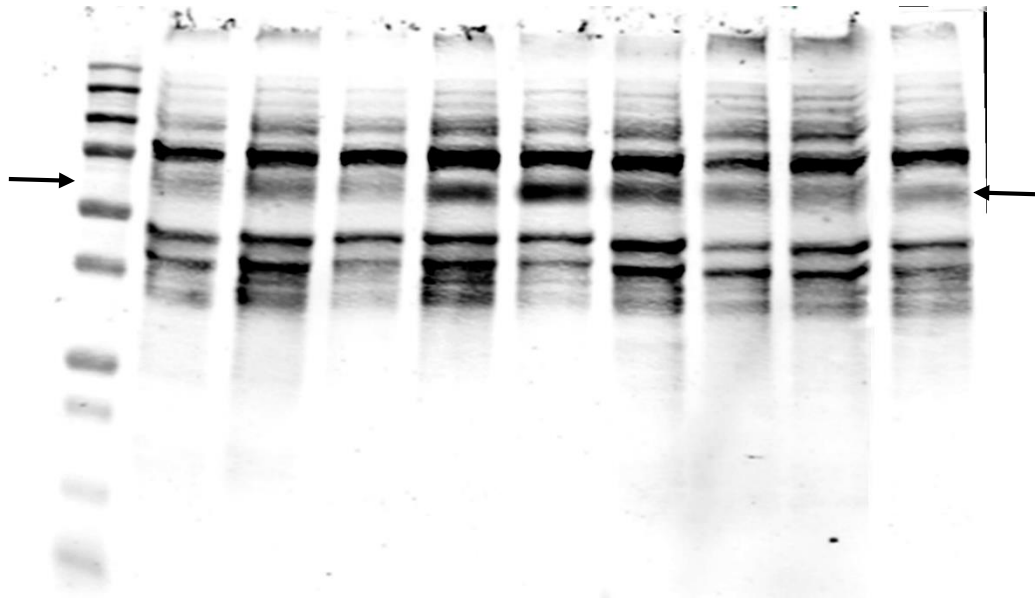

## Full blot

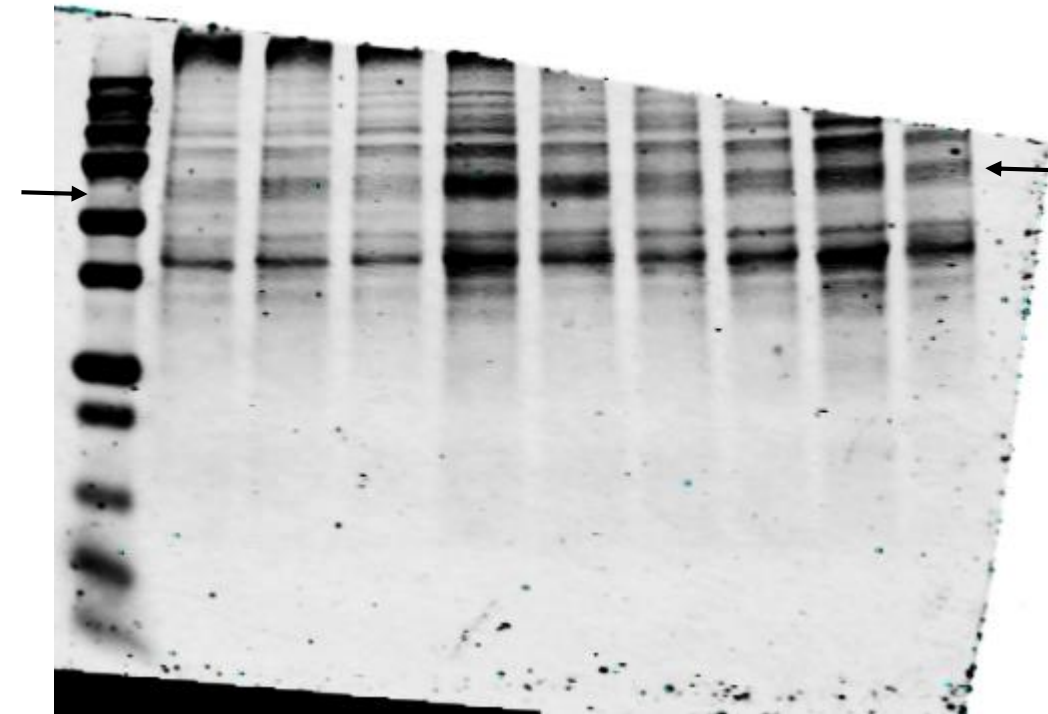

**gp91<sup>phox</sup>**

**gp91<sup>phox</sup> - 8d**

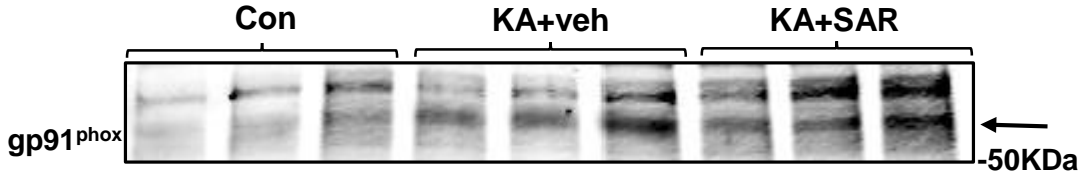

**gp91<sup>phox</sup> - 4m**

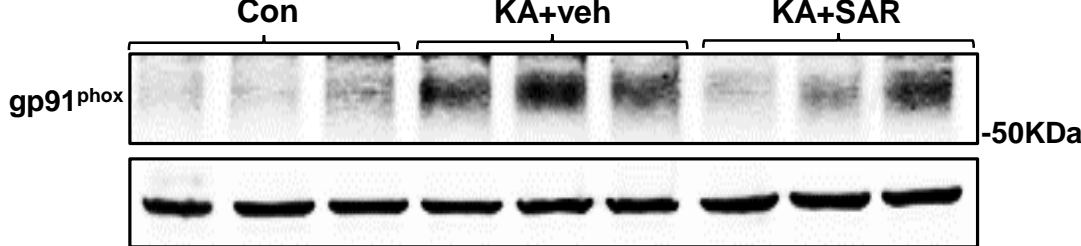

**Full blot**

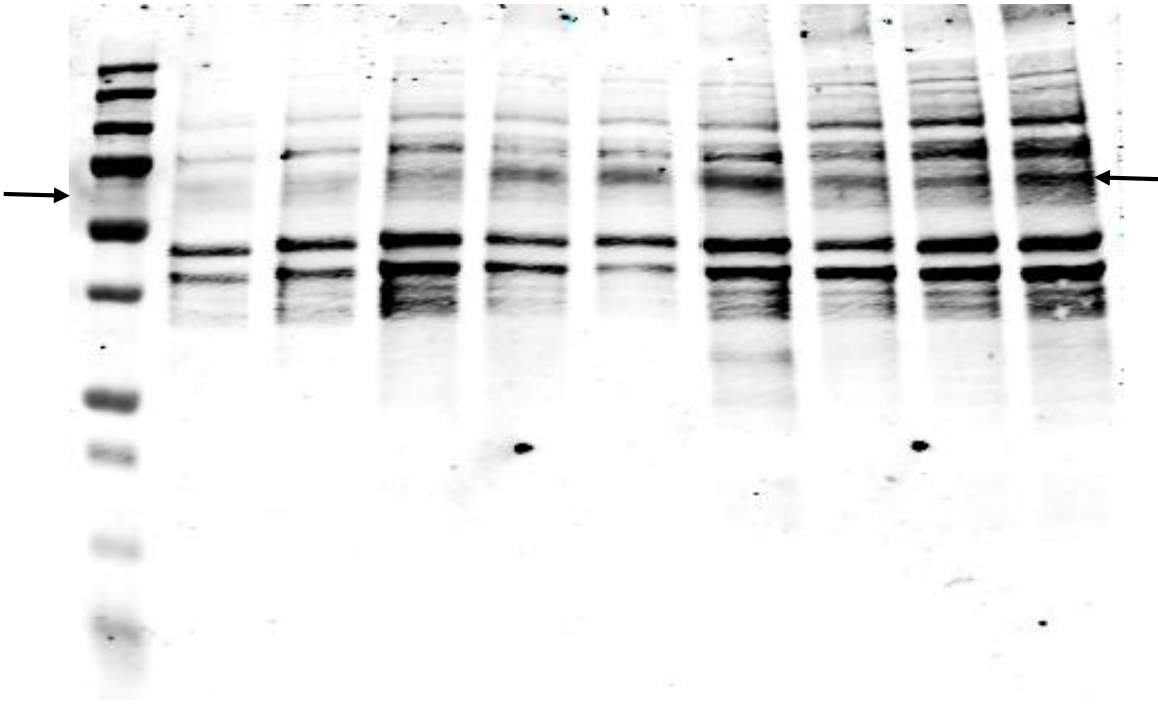

**Full blot**

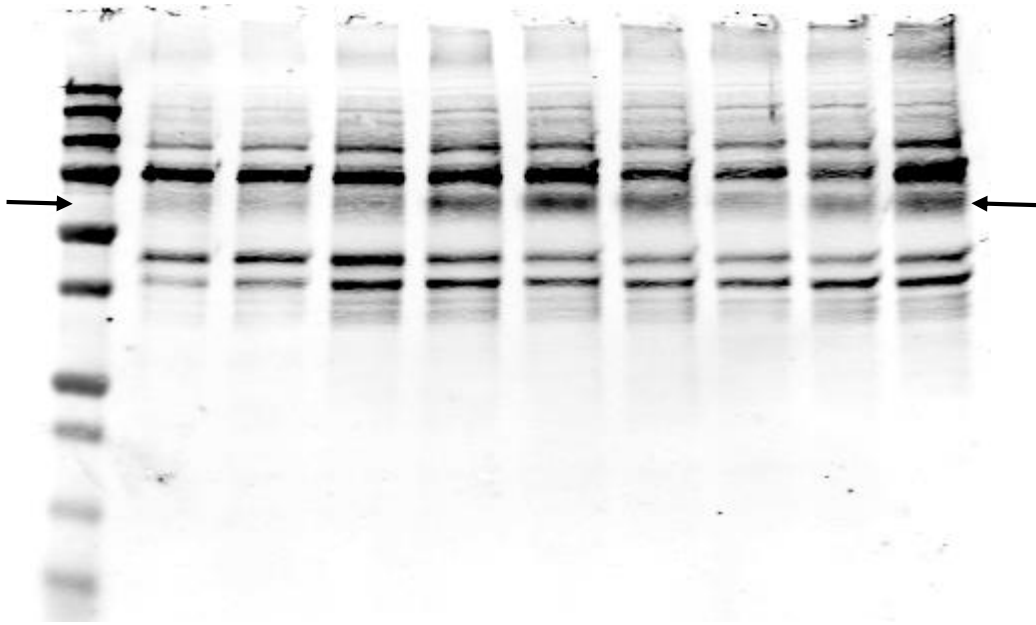

Supplement: NIHMS1725927-supplement-1.pdf [file NIHMS1725927-supplement-1.pdf]
